# Supplementary material for: Activation in the rate of oxygen release of Sr0.8Ca0.2FeO3−δ through removal of secondary surface species with thermal treatment in a CO2-free atmosphere
Source: Royal Society of Chemistry journal article supplement (doi:10.1039/d2ta09102j), 2023-01-01
Supplement: d2ta09102j1.pdf [file d2ta09102j1.pdf]

## Supporting Information

### Activation in the Rate of Oxygen Release of $\text{Sr}_{0.8}\text{Ca}_{0.2}\text{FeO}_{3-\delta}$ Through Removal of Secondary Surface Species with Thermal Treatment in a $\text{CO}_2$ -Free Atmosphere

Giancarlo Luongo, Alexander H. Bork, Paula M. Abdala, Yi-Hsuan Wu, Evgenia Kountoupi, Felix Donat\* and Christoph R. Müller\*

Laboratory of Energy Science and Engineering, Department of Mechanical and Process Engineering, ETH Zurich, Leonhardstrasse 21, 8092 Zürich, Switzerland

\*Corresponding authors: Dr. Felix Donat, email: [donatf@ethz.ch](mailto:donatf@ethz.ch); Prof. Christoph R. Müller, email: [muelchri@ethz.ch](mailto:muelchri@ethz.ch)

Keywords: chemical looping; air separation; oxygen carrier; perovskite; activation

#### 1. Activation in the rate of oxygen release from $\text{Sr}_{1-x}\text{Ca}_x\text{FeO}_{3-\delta}$

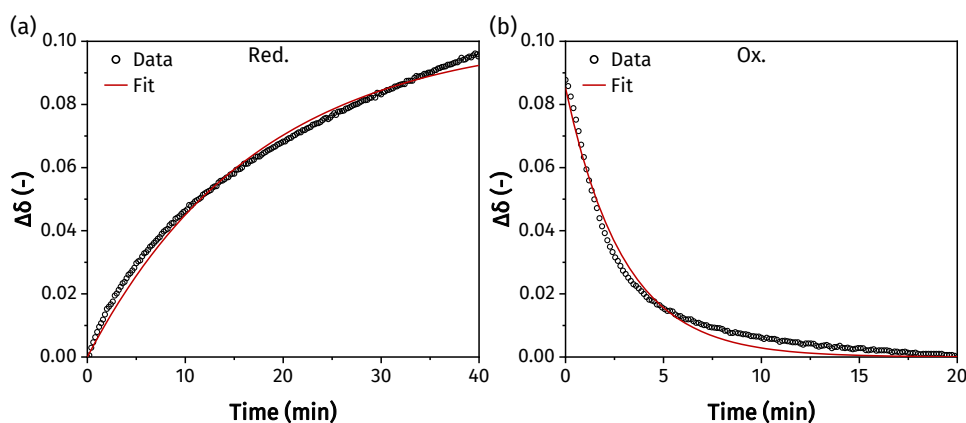

Figure S1 – Fitting of the change in oxygen non-stoichiometry  $\Delta\delta$  during the (a) reduction and (b) oxidation steps of  $\text{Sr}_{0.8}\text{Ca}_{0.2}\text{FeO}_{3-\delta}$  at 500 °C in first cycle.

Figure S2 shows the results of 10 redox cycles carried out with  $\text{SrFeO}_{3-\delta}$ ,  $\text{Sr}_{0.9}\text{Ca}_{0.1}\text{FeO}_{3-\delta}$  and  $\text{Sr}_{0.75}\text{Ca}_{0.25}\text{FeO}_{3-\delta}$  to illustrate that an activation occurs for other compositions of the  $\text{Sr}_{1-x}\text{Ca}_x\text{FeO}_{3-\delta}$  family. Note that here we focused only on phase pure perovskites, which are obtained when  $0 \leq x \leq 0.25$ , as reported in our previous work. <sup>[1]</sup> An increase in the rates of oxygen release was observed for all three samples at 500 °C, with the amount of oxygen released after 10 cycles of ~ 0.80 wt%, ~ 0.90 wt% and ~ 2.02 wt%, for  $\text{SrFeO}_{3-\delta}$ ,  $\text{Sr}_{0.9}\text{Ca}_{0.1}\text{FeO}_{3-\delta}$  and  $\text{Sr}_{0.75}\text{Ca}_{0.25}\text{FeO}_{3-\delta}$ , respectively. <sup>[1]</sup>

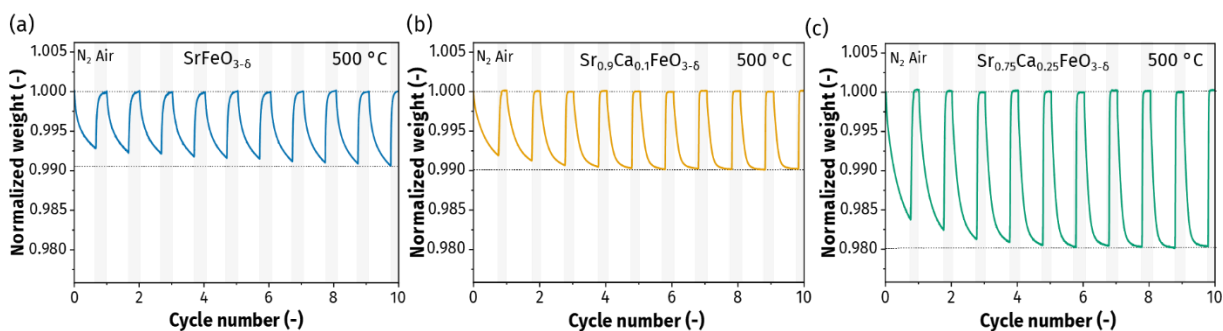

Figure S2 – Redox performance upon cycling. Normalized weight upon redox cycling (40 min reduction in  $N_2$  and 20 min oxidation in air) collected in a TGA at 500 °C for (a)  $SrFeO_{3-\delta}$ , (b)  $Sr_{0.9}Ca_{0.1}FeO_{3-\delta}$  and (c)  $Sr_{0.75}Ca_{0.25}FeO_{3-\delta}$ .

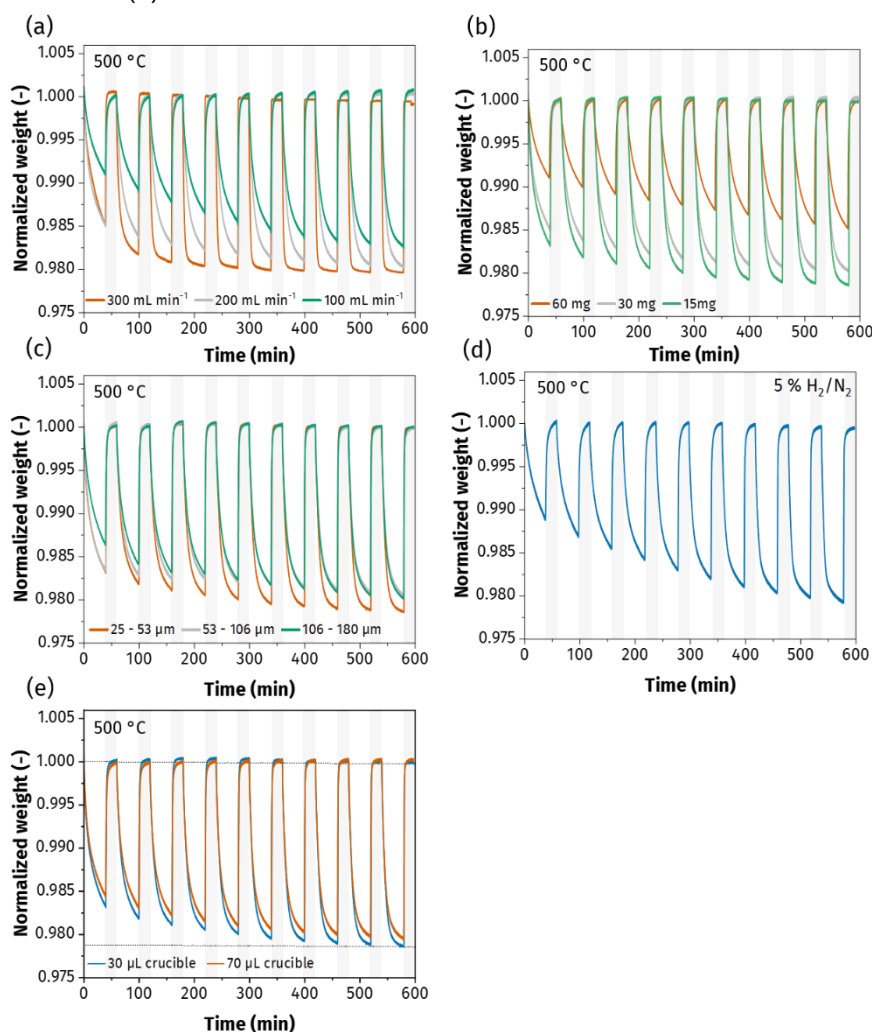

Figure S3 – Influence of different operating conditions on the increase in the rate of oxygen release. Normalized weight of  $Sr_{0.8}Ca_{0.2}FeO_{3-\delta}$  upon redox cycling at 500 °C by using (a) different total flowrates (300  $mL\ min^{-1}$ , 200  $mL\ min^{-1}$ , 100  $mL\ min^{-1}$ ), (b) different total sample masses (60 mg, 30 mg, 15 mg), (c) different particle sizes (25 – 53  $\mu m$ , 53 – 106  $\mu m$ , 106 – 180  $\mu m$ ), (d) 5 %  $H_2/N_2$  reducing atmosphere and (e) by using a shallow 30  $\mu L$  or a 70  $\mu L$  crucible.

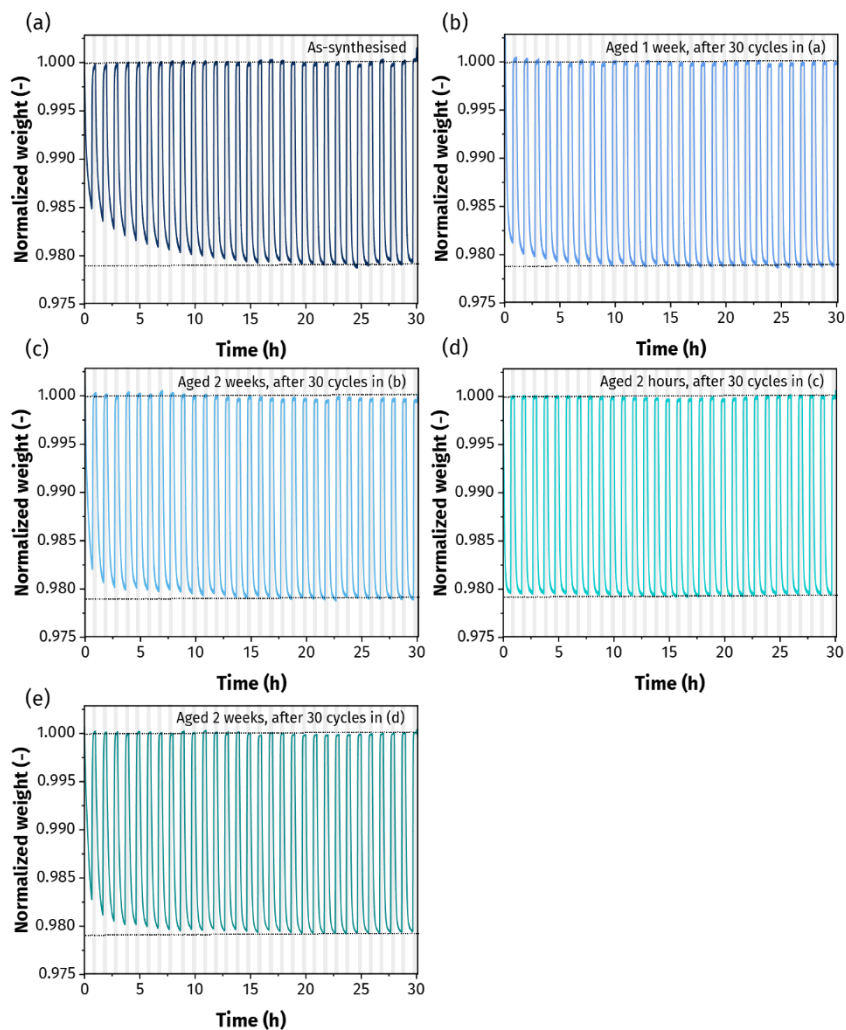

Figure S4 – The effect of aging at ambient conditions in a closed vial on the increase in the rate of oxygen release. Normalized weight upon redox cycling at 500 °C of the same sample when (a) as synthesized, (b) after aging for 1 week, (c) after aging for additional 2 weeks, (d) after aging for 2 hours after activation in (c), (e) after activation in (d) and aging for another 2 weeks.

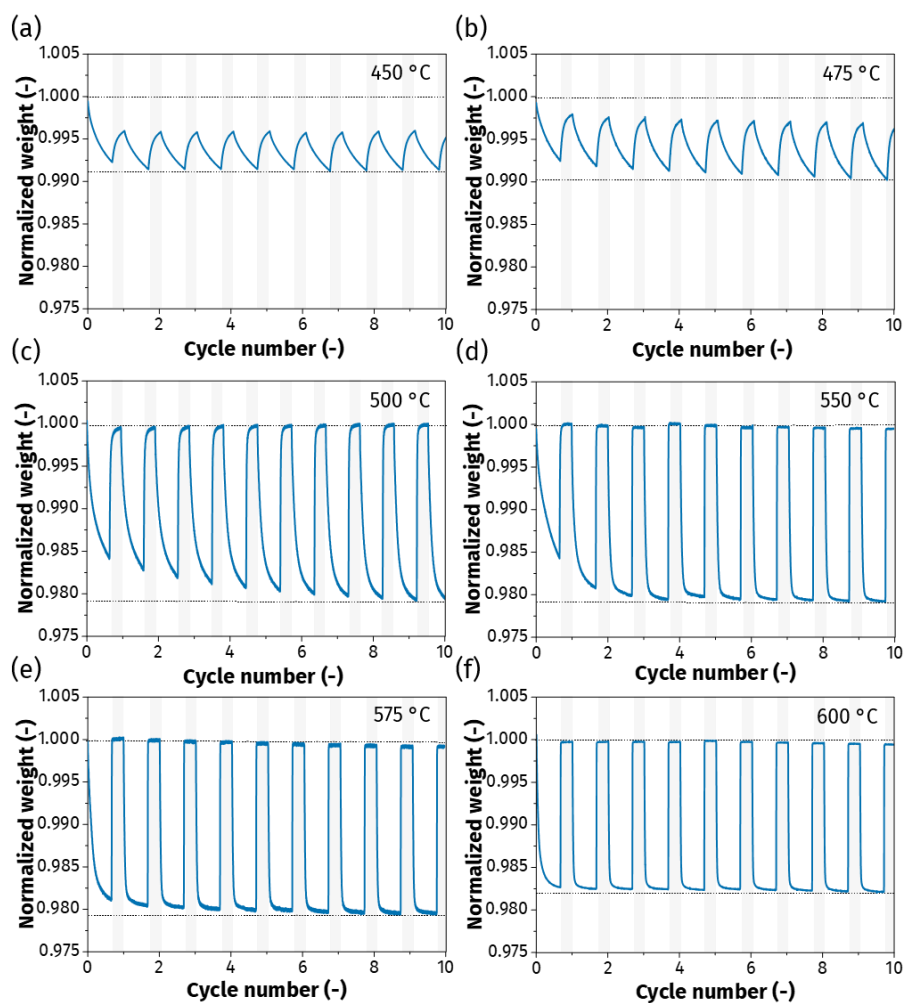

Figure S5 – The effect of the temperature on the increase in the rate of oxygen release. Normalized weight upon cycling at (a) 450 °C, (b) 475 °C, (c) 500 °C, (d) 550 °C, (e) 575 °C and (f) 600 °C.

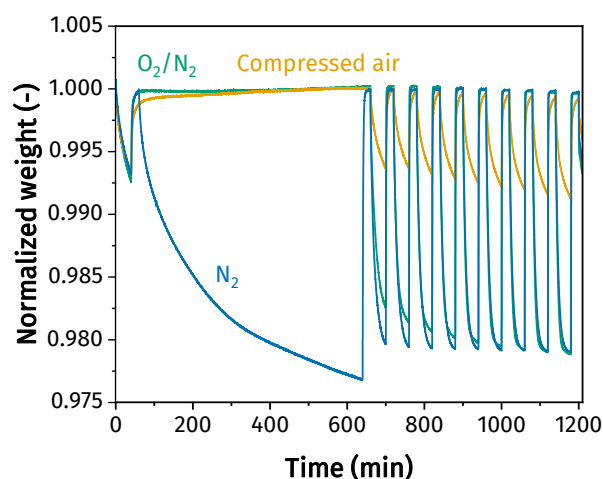

Figure S6 – Normalized weight of  $\text{Sr}_{0.8}\text{Ca}_{0.2}\text{FeO}_{3.5}$  upon one redox cycle followed by exposure to  $\text{N}_2$  for 10 h, synthetic air ( $\text{O}_2/\text{N}_2$ ) or compressed air (containing small amounts of  $\text{CO}_2$ ), and then nine redox cycles, with 40 min reduction in  $\text{N}_2$  and 20 min oxidation in synthetic air or compressed air, at 500 °C.

Table S1 – Fitted parameters used for the calculation of the relaxation times of reaction and goodness of the fit for different TGA measurements.

| Cycle number | Fitted parameters, 10 cycles, see Figure 1 |        |                |
|--------------|--------------------------------------------|--------|----------------|
|              | T <sub>RED</sub>                           | a      | R <sup>2</sup> |
| 1            | 5.7872                                     | 0.1904 | 0.98983        |
| 2            | 5.7872                                     | 0.1904 | 0.99607        |
| 3            | 5.7872                                     | 0.1904 | 0.99738        |
| 4            | 5.7872                                     | 0.1904 | 0.99809        |
| 5            | 5.7872                                     | 0.1904 | 0.99919        |
| 6            | 5.7872                                     | 0.1904 | 0.99896        |
| 7            | 5.7872                                     | 0.1904 | 0.99878        |
| 8            | 5.7872                                     | 0.1904 | 0.99906        |
| 9            | 5.7872                                     | 0.1904 | 0.99902        |
| 10           | 5.7872                                     | 0.1904 | 0.99904        |

| Cycle number | Fitted parameters, As synthesized, see Figure S4a |         |                | Fitted parameters, 1 week, see Figure S4b |         |                |
|--------------|---------------------------------------------------|---------|----------------|-------------------------------------------|---------|----------------|
|              | T <sub>RED</sub>                                  | a       | R <sup>2</sup> | T <sub>RED</sub>                          | a       | R <sup>2</sup> |
| 1            | 10.138                                            | 0.1507  | 0.98558        | 7.2424                                    | 0.21104 | 0.99772        |
| 2            | 8.661                                             | 0.15862 | 0.98303        | 5.6982                                    | 0.20187 | 0.99723        |
| 3            | 7.7509                                            | 0.16844 | 0.98422        | 5.411                                     | 0.20289 | 0.99715        |
| 4            | 7.254                                             | 0.1765  | 0.98572        | 5.2248                                    | 0.20462 | 0.99702        |
| 5            | 6.8704                                            | 0.18255 | 0.98637        | 5.1499                                    | 0.20305 | 0.99759        |
| 6            | 6.6678                                            | 0.18582 | 0.98976        | 5.0125                                    | 0.20347 | 0.99772        |
| 7            | 6.3449                                            | 0.19064 | 0.98988        | 4.9282                                    | 0.20317 | 0.99771        |
| 8            | 6.1233                                            | 0.19371 | 0.99122        | 4.7487                                    | 0.20625 | 0.99674        |
| 9            | 5.9406                                            | 0.19605 | 0.99231        | 4.6492                                    | 0.20588 | 0.99702        |
| 10           | 5.7114                                            | 0.19883 | 0.99294        | 4.5983                                    | 0.20452 | 0.99734        |
| 11           | 5.4414                                            | 0.20256 | 0.9918         | 4.4848                                    | 0.20586 | 0.99646        |
| 12           | 5.3044                                            | 0.20357 | 0.99271        | 4.455                                     | 0.20527 | 0.99684        |
| 13           | 5.1715                                            | 0.20333 | 0.99375        | 4.3698                                    | 0.20605 | 0.99616        |
| 14           | 5.0351                                            | 0.2053  | 0.99343        | 4.3543                                    | 0.20365 | 0.99692        |
| 15           | 4.8828                                            | 0.20748 | 0.99271        | 4.3024                                    | 0.20411 | 0.99649        |
| 16           | 4.7561                                            | 0.20846 | 0.99225        | 4.1934                                    | 0.20555 | 0.99515        |
| 17           | 4.7344                                            | 0.20793 | 0.9932         | 4.2607                                    | 0.20397 | 0.99587        |
| 18           | 4.5832                                            | 0.20943 | 0.99177        | 4.2811                                    | 0.20347 | 0.99561        |
| 19           | 4.4978                                            | 0.20907 | 0.99193        | 4.1839                                    | 0.20408 | 0.99485        |
| 20           | 4.4542                                            | 0.20794 | 0.99243        | 4.0762                                    | 0.2041  | 0.9937         |
| 21           | 4.3664                                            | 0.20741 | 0.9922         | 4.0123                                    | 0.20394 | 0.99331        |
| 22           | 4.2835                                            | 0.20795 | 0.99112        | 4.0087                                    | 0.20156 | 0.99413        |
| 23           | 4.2172                                            | 0.20736 | 0.99083        | 3.93                                      | 0.20275 | 0.99294        |
| 24           | 4.151                                             | 0.20745 | 0.98994        | 3.8531                                    | 0.20334 | 0.99131        |
| 25           | 3.9839                                            | 0.21194 | 0.98433        | 3.8069                                    | 0.20238 | 0.99117        |
| 26           | 4.0781                                            | 0.20621 | 0.98972        | 3.7591                                    | 0.20115 | 0.99123        |
| 27           | 3.9904                                            | 0.20749 | 0.98768        | 3.7393                                    | 0.19999 | 0.9908         |
| 28           | 3.9877                                            | 0.20654 | 0.98752        | 3.7133                                    | 0.19938 | 0.9909         |
| 29           | 3.9365                                            | 0.2065  | 0.98665        | 3.6267                                    | 0.20147 | 0.98798        |
| 30           | 3.887                                             | 0.20654 | 0.98558        | 3.5773                                    | 0.20122 | 0.98705        |

| Cycle number | Fitted parameters, 2 weeks, see Figure S4c |         |                | Fitted parameters, 2 hours, see Figure S4d |         |                |
|--------------|--------------------------------------------|---------|----------------|--------------------------------------------|---------|----------------|
|              | T <sub>RED</sub>                           | a       | R <sup>2</sup> | T <sub>RED</sub>                           | a       | R <sup>2</sup> |
| 1            | 14.575                                     | 0.2077  | 0.99055        | 5.7342                                     | 0.22202 | 0.99759        |
| 2            | 10.363                                     | 0.20864 | 0.99834        | 4.8843                                     | 0.21925 | 0.99848        |
| 3            | 8.6285                                     | 0.21093 | 0.99836        | 4.8235                                     | 0.21831 | 0.99842        |
| 4            | 7.8306                                     | 0.21102 | 0.9987         | 4.7527                                     | 0.21749 | 0.99836        |
| 5            | 7.293                                      | 0.21182 | 0.99882        | 4.6719                                     | 0.21898 | 0.99845        |
| 6            | 6.8525                                     | 0.21331 | 0.9986         | 4.6642                                     | 0.21753 | 0.9985         |
| 7            | 6.5602                                     | 0.2135  | 0.99868        | 4.6363                                     | 0.21743 | 0.99852        |
| 8            | 6.2089                                     | 0.21671 | 0.9979         | 4.5362                                     | 0.21936 | 0.99854        |
| 9            | 6.159                                      | 0.21396 | 0.99852        | 4.4964                                     | 0.2195  | 0.99841        |
| 10           | 5.9359                                     | 0.21441 | 0.99831        | 4.4509                                     | 0.21983 | 0.99829        |
| 11           | 5.7531                                     | 0.21638 | 0.99789        | 4.4281                                     | 0.22025 | 0.99812        |
| 12           | 5.6083                                     | 0.2153  | 0.99807        | 4.3957                                     | 0.21894 | 0.99801        |
| 13           | 5.4978                                     | 0.21564 | 0.99787        | 4.383                                      | 0.21857 | 0.99802        |
| 14           | 5.3346                                     | 0.21667 | 0.99726        | 4.3174                                     | 0.21944 | 0.9975         |
| 15           | 5.1824                                     | 0.21702 | 0.99703        | 4.3059                                     | 0.2179  | 0.99757        |
| 16           | 5.099                                      | 0.21666 | 0.99691        | 4.2783                                     | 0.21811 | 0.99731        |
| 17           | 4.9806                                     | 0.21728 | 0.99641        | 4.2227                                     | 0.21997 | 0.99644        |
| 18           | 4.9743                                     | 0.21519 | 0.99703        | 4.2049                                     | 0.21962 | 0.996          |
| 19           | 4.8672                                     | 0.2153  | 0.99654        | 4.184                                      | 0.21926 | 0.99562        |
| 20           | 4.797                                      | 0.21653 | 0.99569        | 4.1464                                     | 0.21952 | 0.99496        |
| 21           | 4.7467                                     | 0.21579 | 0.9956         | 4.1764                                     | 0.21672 | 0.99582        |
| 22           | 4.6958                                     | 0.2153  | 0.99537        | 4.0851                                     | 0.21889 | 0.99419        |
| 23           | 4.5837                                     | 0.21743 | 0.99375        | 4.0799                                     | 0.21709 | 0.99453        |
| 24           | 4.5809                                     | 0.21533 | 0.99423        | 4.0503                                     | 0.21687 | 0.99386        |
| 25           | 4.4867                                     | 0.21741 | 0.99228        | 3.9986                                     | 0.21727 | 0.99312        |
| 26           | 4.4732                                     | 0.21647 | 0.99235        | 3.9451                                     | 0.2183  | 0.99168        |
| 27           | 4.4067                                     | 0.21738 | 0.99105        | 3.8825                                     | 0.21883 | 0.98995        |
| 28           | 4.3398                                     | 0.21779 | 0.98988        | 3.8612                                     | 0.21802 | 0.99011        |
| 29           | 4.3222                                     | 0.21606 | 0.99027        | 3.8605                                     | 0.2165  | 0.99015        |
| 30           | 4.2483                                     | 0.21687 | 0.98869        | 3.8115                                     | 0.21743 | 0.9884         |

| Cycle number | Fitted parameters, 2 weeks, see Figure S4e |         |                |
|--------------|--------------------------------------------|---------|----------------|
|              | T <sub>RED</sub>                           | a       | R <sup>2</sup> |
| 1            | 24.038                                     | 0.23307 | 0.99392        |
| 2            | 12.795                                     | 0.2072  | 0.99787        |
| 3            | 10.364                                     | 0.20822 | 0.99847        |
| 4            | 9.035                                      | 0.21028 | 0.99844        |
| 5            | 8.2775                                     | 0.20691 | 0.99817        |
| 6            | 7.6922                                     | 0.21133 | 0.99859        |
| 7            | 7.2962                                     | 0.21119 | 0.99868        |
| 8            | 6.969                                      | 0.21136 | 0.99859        |
| 9            | 6.6969                                     | 0.21154 | 0.99851        |
| 10           | 6.4747                                     | 0.21109 | 0.99852        |
| 11           | 6.2754                                     | 0.21174 | 0.99822        |
| 12           | 6.0947                                     | 0.21193 | 0.99806        |
| 13           | 5.9445                                     | 0.21181 | 0.99795        |
| 14           | 5.8213                                     | 0.2121  | 0.99772        |
| 15           | 5.703                                      | 0.21179 | 0.99753        |
| 16           | 5.6257                                     | 0.21145 | 0.99745        |

|    |        |         |         |
|----|--------|---------|---------|
| 17 | 5.6749 | 0.20698 | 0.99792 |
| 18 | 5.4312 | 0.21079 | 0.9969  |
| 19 | 5.3566 | 0.21067 | 0.99664 |
| 20 | 5.2759 | 0.21016 | 0.99633 |
| 21 | 5.2232 | 0.20996 | 0.99606 |
| 22 | 5.155  | 0.2098  | 0.99576 |
| 23 | 5.103  | 0.20922 | 0.99541 |
| 24 | 5.0647 | 0.20919 | 0.9951  |
| 25 | 5.0003 | 0.20897 | 0.9946  |
| 26 | 4.9459 | 0.20831 | 0.99435 |
| 27 | 4.9022 | 0.208   | 0.99396 |
| 28 | 4.8453 | 0.20813 | 0.99318 |
| 29 | 4.7941 | 0.2077  | 0.99289 |
| 30 | 4.741  | 0.20753 | 0.9922  |

| Cycle number | Fitted parameters, CO <sub>2</sub> _1%, see Figure 2a |          |                | Fitted parameters, CO <sub>2</sub> _5%, see Figure 2a |         |                |
|--------------|-------------------------------------------------------|----------|----------------|-------------------------------------------------------|---------|----------------|
|              | T <sub>RED</sub>                                      | a        | R <sup>2</sup> | T <sub>RED</sub>                                      | a       | R <sup>2</sup> |
| 1            | 15.934                                                | 0.077424 | 0.99658        | 12.024                                                | 0.13328 | 0.98967        |
| 2            | 11.222                                                | 0.079306 | 0.98905        | 9.1614                                                | 0.14535 | 0.99022        |
| 3            | 11.004                                                | 0.080069 | 0.99148        | 8.0088                                                | 0.15305 | 0.98448        |
| 4            | 9.9637                                                | 0.080689 | 0.98897        | 7.7031                                                | 0.15939 | 0.98726        |
| 5            | 10.158                                                | 0.082546 | 0.99214        | 7.3681                                                | 0.16535 | 0.98759        |
| 6            | 18.344                                                | 0.085848 | 0.99937        | 19.646                                                | 0.18186 | 0.99904        |
| 7            | 10.086                                                | 0.081742 | 0.98928        | 7.4402                                                | 0.16644 | 0.9908         |
| 8            | 9.6944                                                | 0.082786 | 0.98915        | 6.7818                                                | 0.17057 | 0.99129        |
| 9            | 9.111                                                 | 0.083428 | 0.98755        | 6.5176                                                | 0.17333 | 0.99019        |
| 10           | 8.8739                                                | 0.084327 | 0.98801        | 6.3721                                                | 0.17641 | 0.98995        |

| Cycle number | Fitted parameters, CO <sub>2</sub> _10%, see Figure 2a |         |                | Fitted parameters, CO <sub>2</sub> _50%, see Figure 2a |         |                |
|--------------|--------------------------------------------------------|---------|----------------|--------------------------------------------------------|---------|----------------|
|              | T <sub>RED</sub>                                       | a       | R <sup>2</sup> | T <sub>RED</sub>                                       | a       | R <sup>2</sup> |
| 1            | 9.7886                                                 | 0.14222 | 0.98759        | 9.7727                                                 | 0.14441 | 0.98833        |
| 2            | 8.4754                                                 | 0.14961 | 0.9856         | 8.5107                                                 | 0.15236 | 0.98695        |
| 3            | 7.823                                                  | 0.15841 | 0.9862         | 7.8432                                                 | 0.15979 | 0.98685        |
| 4            | 7.4474                                                 | 0.16431 | 0.98759        | 8.1446                                                 | 0.16593 | 0.99589        |
| 5            | 7.3007                                                 | 0.16772 | 0.99005        | 7.2471                                                 | 0.17012 | 0.99226        |
| 6            | 22.854                                                 | 0.19763 | 0.99847        | 5096.5                                                 | 22.232  | 0.99324        |
| 7            | 7.242                                                  | 0.17006 | 0.98974        | 7.3896                                                 | 0.16916 | 0.9922         |
| 8            | 6.6039                                                 | 0.17434 | 0.99078        | 6.4553                                                 | 0.17372 | 0.98981        |
| 9            | 6.4447                                                 | 0.17496 | 0.99174        | 6.2611                                                 | 0.17699 | 0.99022        |
| 10           | 6.2994                                                 | 0.17808 | 0.99148        | 6.1565                                                 | 0.17731 | 0.99057        |

| Cycle number | Fitted parameters, 450 °C, see Figure S5a |        |          |          |                               |                              |
|--------------|-------------------------------------------|--------|----------|----------|-------------------------------|------------------------------|
|              | T <sub>RED</sub>                          | Tox    | a        | b        | R <sup>2</sup> <sub>RED</sub> | R <sup>2</sup> <sub>OX</sub> |
| 1            | 22.036                                    | 5.8369 | 0.043112 | 0.021878 | 0.99696                       | 0.99555                      |
| 2            | 23.864                                    | 6.1412 | 0.035327 | 0.023252 | 0.99586                       | 0.996                        |
| 3            | 23.602                                    | 6.2755 | 0.034173 | 0.023275 | 0.99561                       | 0.99671                      |
| 4            | 23.642                                    | 6.2036 | 0.034161 | 0.023737 | 0.99435                       | 0.99491                      |
| 5            | 24.217                                    | 6.356  | 0.034292 | 0.02386  | 0.99612                       | 0.99617                      |
| 6            | 23.622                                    | 6.3161 | 0.034418 | 0.023941 | 0.9946                        | 0.99543                      |

|           |        |        |          |          |         |         |
|-----------|--------|--------|----------|----------|---------|---------|
| <b>7</b>  | 23.887 | 6.2821 | 0.034372 | 0.024182 | 0.99552 | 0.99522 |
| <b>8</b>  | 23.949 | 6.2503 | 0.034262 | 0.024341 | 0.99506 | 0.99496 |
| <b>9</b>  | 23.616 | 6.4856 | 0.034035 | 0.024665 | 0.99472 | 0.99624 |
| <b>10</b> | 22.697 | -      | 0.0333   | -        | 0.99431 | -       |

| Cycle number | Fitted parameters, 475 °C, see Figure S5b |                 |          |          |                               |                              |
|--------------|-------------------------------------------|-----------------|----------|----------|-------------------------------|------------------------------|
|              | T <sub>RED</sub>                          | T <sub>OX</sub> | a        | b        | R <sup>2</sup> <sub>RED</sub> | R <sup>2</sup> <sub>OX</sub> |
| <b>1</b>     | 20.248                                    | 4.6995          | 0.068775 | 0.050057 | 0.9973                        | 0.99684                      |
| <b>2</b>     | 17.823                                    | 4.6442          | 0.057883 | 0.052121 | 0.99612                       | 0.99754                      |
| <b>3</b>     | 16.857                                    | 4.6157          | 0.057251 | 0.053061 | 0.99457                       | 0.997                        |
| <b>4</b>     | 16.141                                    | 4.5951          | 0.057166 | 0.053679 | 0.99359                       | 0.99695                      |
| <b>5</b>     | 15.982                                    | 4.5974          | 0.05763  | 0.054336 | 0.99335                       | 0.9967                       |
| <b>6</b>     | 16.183                                    | 4.5014          | 0.058433 | 0.054727 | 0.9944                        | 0.99628                      |
| <b>7</b>     | 15.603                                    | 4.4788          | 0.058551 | 0.055007 | 0.99337                       | 0.99542                      |
| <b>8</b>     | 15.541                                    | 4.4114          | 0.059655 | 0.055518 | 0.99289                       | 0.99522                      |
| <b>9</b>     | 15.159                                    | 4.3958          | 0.060542 | 0.056036 | 0.99215                       | 0.9951                       |
| <b>10</b>    | 14.868                                    | -               | 0.060611 | -        | 0.99209                       | -                            |

| Cycle number | Fitted parameters, 500 °C, see Figure S5c |                 |          |          |                               |                              |
|--------------|-------------------------------------------|-----------------|----------|----------|-------------------------------|------------------------------|
|              | T <sub>RED</sub>                          | T <sub>OX</sub> | a        | b        | R <sup>2</sup> <sub>RED</sub> | R <sup>2</sup> <sub>OX</sub> |
| <b>1</b>     | 15.28                                     | 2.9481          | 0.095772 | 0.085185 | 0.99482                       | 0.98162                      |
| <b>2</b>     | 11.858                                    | 2.7401          | 0.09664  | 0.095022 | 0.9879                        | 0.97738                      |
| <b>3</b>     | 10.911                                    | 2.4802          | 0.10475  | 0.10348  | 0.9877                        | 0.97376                      |
| <b>4</b>     | 10.356                                    | 2.2335          | 0.11273  | 0.11092  | 0.98851                       | 0.97224                      |
| <b>5</b>     | 9.7018                                    | 2.0676          | 0.12048  | 0.11717  | 0.98792                       | 0.96819                      |
| <b>6</b>     | 9.2381                                    | 1.9252          | 0.12812  | 0.12281  | 0.9878                        | 0.96557                      |
| <b>7</b>     | 8.8418                                    | 1.7653          | 0.13484  | 0.12841  | 0.98838                       | 0.96918                      |
| <b>8</b>     | 8.4963                                    | 1.6496          | 0.14132  | 0.13394  | 0.98896                       | 0.96868                      |
| <b>9</b>     | 8.1397                                    | 1.517           | 0.14801  | 0.13898  | 0.98849                       | 0.97241                      |
| <b>10</b>    | 7.9161                                    | -               | 0.15378  | -        | 0.98957                       | -                            |

| Cycle number | Fitted parameters, 550 °C, see Figure S5d |                 |         |         |                               |                              |
|--------------|-------------------------------------------|-----------------|---------|---------|-------------------------------|------------------------------|
|              | T <sub>RED</sub>                          | T <sub>OX</sub> | a       | b       | R <sup>2</sup> <sub>RED</sub> | R <sup>2</sup> <sub>OX</sub> |
| <b>1</b>     | 14.336                                    | 0.47098         | 0.19538 | 0.1952  | 0.98975                       | 0.99536                      |
| <b>2</b>     | 3.5546                                    | 0.32146         | 0.17827 | 0.19851 | 0.99638                       | 0.99279                      |
| <b>3</b>     | 2.7054                                    | 0.27787         | 0.18167 | 0.1885  | 0.99791                       | 0.99129                      |
| <b>4</b>     | 2.3724                                    | 0.26078         | 0.18136 | 0.1756  | 0.99805                       | 0.98989                      |
| <b>5</b>     | 2.1702                                    | 0.24984         | 0.18275 | 0.1628  | 0.99788                       | 0.98957                      |
| <b>6</b>     | 2.0367                                    | 0.24244         | 0.18098 | 0.14992 | 0.99772                       | 0.98923                      |
| <b>7</b>     | 1.9205                                    | 0.23636         | 0.18151 | 0.13749 | 0.99741                       | 0.98911                      |
| <b>8</b>     | 1.8373                                    | 0.23166         | 0.17963 | 0.12602 | 0.99709                       | 0.9894                       |
| <b>9</b>     | 1.7618                                    | 0.2273          | 0.17891 | 0.11496 | 0.99665                       | 0.98896                      |
| <b>10</b>    | 1.7004                                    | -               | 0.17864 | -       | 0.99583                       | -                            |

| Cycle number | Fitted parameters, 575 °C, see Figure S5e |                 |         |         |                               |                              |
|--------------|-------------------------------------------|-----------------|---------|---------|-------------------------------|------------------------------|
|              | T <sub>RED</sub>                          | T <sub>OX</sub> | a       | b       | R <sup>2</sup> <sub>RED</sub> | R <sup>2</sup> <sub>OX</sub> |
| <b>1</b>     | 5.6079                                    | 0.38419         | 0.18244 | 0.23916 | 0.99626                       | 0.95223                      |
| <b>2</b>     | 1.7643                                    | 0.33604         | 0.18627 | 0.23379 | 0.99527                       | 0.9492                       |
| <b>3</b>     | 1.49                                      | 0.32226         | 0.18665 | 0.22326 | 0.9963                        | 0.94764                      |



|           |        |         |         |         |         |         |
|-----------|--------|---------|---------|---------|---------|---------|
| <b>4</b>  | 1.3484 | 0.3173  | 0.1894  | 0.21206 | 0.99636 | 0.94788 |
| <b>5</b>  | 1.268  | 0.3183  | 0.18682 | 0.2016  | 0.99596 | 0.94721 |
| <b>6</b>  | 1.1999 | 0.30877 | 0.18663 | 0.18937 | 0.99536 | 0.9485  |
| <b>7</b>  | 1.15   | 0.30273 | 0.18646 | 0.17775 | 0.99406 | 0.94813 |
| <b>8</b>  | 1.1036 | 0.29842 | 0.18569 | 0.16665 | 0.99282 | 0.94861 |
| <b>9</b>  | 1.0625 | 0.29573 | 0.18563 | 0.15688 | 0.99083 | 0.95027 |
| <b>10</b> | 1.0315 | -       | 0.18515 | -       | 0.98783 | -       |

| <b>Cycle number</b> | <b>Fitted parameters, 600 °C, see Figure S5f</b> |                       |          |          |                                    |                                   |
|---------------------|--------------------------------------------------|-----------------------|----------|----------|------------------------------------|-----------------------------------|
|                     | <b>T<sub>RED</sub></b>                           | <b>T<sub>OX</sub></b> | <b>a</b> | <b>b</b> | <b>R<sup>2</sup><sub>RED</sub></b> | <b>R<sup>2</sup><sub>OX</sub></b> |
| <b>1</b>            | 2.2641                                           | 0.30381               | 0.17752  | 0.23322  | 0.963                              | 0.94643                           |
| <b>2</b>            | 1.1136                                           | 0.28914               | 0.17869  | 0.22365  | 0.99195                            | 0.94547                           |
| <b>3</b>            | 0.98292                                          | 0.28393               | 0.17906  | 0.21102  | 0.99321                            | 0.9457                            |
| <b>4</b>            | 0.90854                                          | 0.27805               | 0.17881  | 0.19769  | 0.99304                            | 0.94666                           |
| <b>5</b>            | 0.85258                                          | 0.27424               | 0.17857  | 0.18493  | 0.99264                            | 0.94725                           |
| <b>6</b>            | 0.81223                                          | 0.26994               | 0.17839  | 0.17318  | 0.991                              | 0.94783                           |
| <b>7</b>            | 0.7775                                           | 0.26736               | 0.17793  | 0.16182  | 0.98876                            | 0.94839                           |
| <b>8</b>            | 0.74679                                          | 0.264                 | 0.17806  | 0.15072  | 0.9851                             | 0.94979                           |
| <b>9</b>            | 0.7231                                           | 0.26131               | 0.17699  | 0.14066  | 0.98085                            | 0.95019                           |
| <b>10</b>           | 0.70081                                          | -                     | 0.17716  | -        | 0.97312                            | -                                 |

## 2. Bulk perovskite structure and changes upon redox cycling

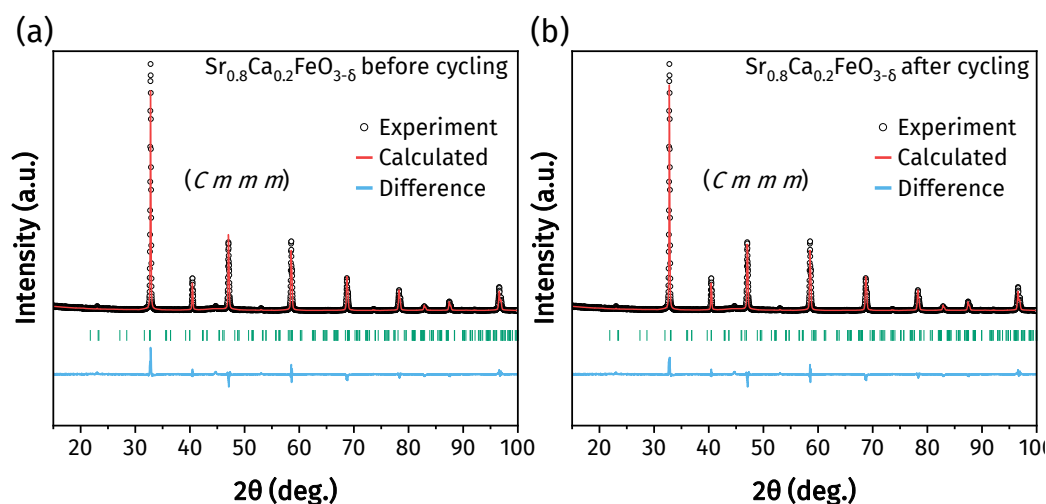

Figure S7 – Full pattern refinement (Rietveld analysis) of  $\text{Sr}_{0.8}\text{Ca}_{0.2}\text{FeO}_{3-\delta}$  before and after redox cycling (30 redox cycles in a TGA at 500 °C). The calculated lattice parameters were  $a = 10.906(4)$  Å,  $b = 7.674(6)$  Å and  $c = 5.472(4)$  Å for the sample before cycling and  $a = 10.901(6)$  Å,  $b = 7.671(2)$  Å and  $c = 5.469(5)$  Å for the sample after cycling.

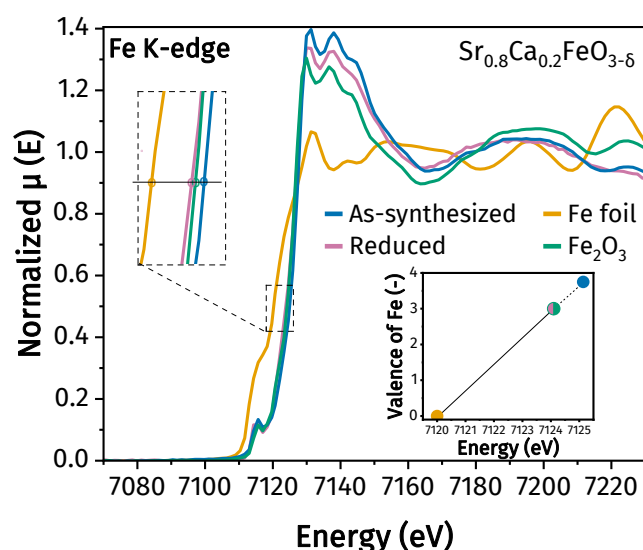

Figure S8 – Fe K-edge XANES of  $\text{Sr}_{0.8}\text{Ca}_{0.2}\text{FeO}_{3-\delta}$  as synthesized and reduced (after 40 min in  $\text{N}_2$  at 500 °C), together with Fe foil and  $\text{Fe}_2\text{O}_3$  that acted as references. The inset plot on the top left side shows a zoom into the edge position. The inset on the bottom right plots the oxidation state of the materials against the edge positions (determined at half of the normalized intensity [2]), considering Fe foil ( $\text{Fe}^0$ ) and  $\text{Fe}_2\text{O}_3$  ( $\text{Fe}^{+3}$ ) as the respective references. The average valence state of Fe in  $\text{Sr}_{0.8}\text{Ca}_{0.2}\text{FeO}_{3-\delta}$  as synthesized was extrapolated by using a linear relationship and was found to be between +4 and +3 (ca.  $\text{Fe}^{+3.76}$ ), giving an indirect measurement of the initial non-stoichiometry of approximately  $\delta = 0.14$ .

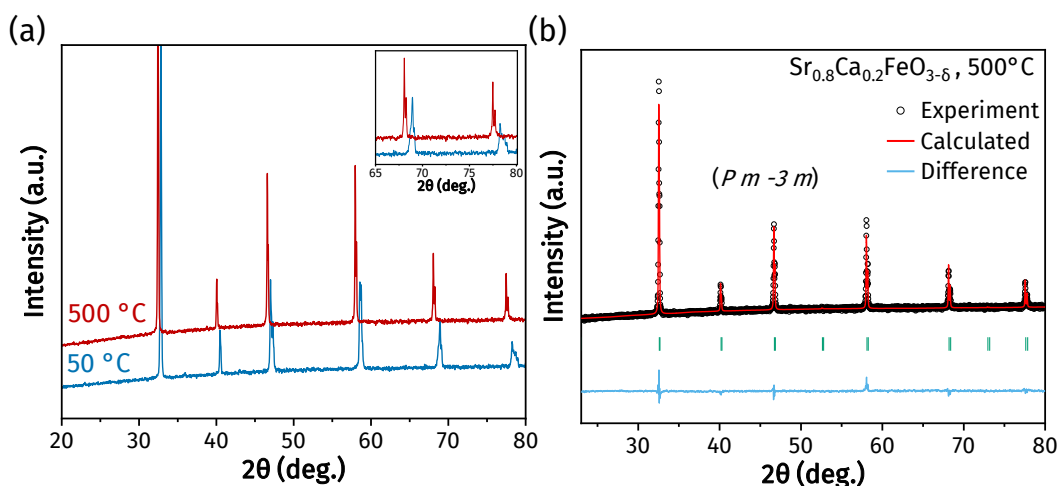

Figure S9 – Structural change of the perovskite from orthorhombic to cubic upon heating to 500 °C in air. (a) In-situ XRD patterns of  $\text{Sr}_{0.8}\text{Ca}_{0.2}\text{FeO}_{3-\delta}$  collected at 50 °C and 500 °C. (b) Full pattern refinement (Rietveld analysis) of  $\text{Sr}_{0.8}\text{Ca}_{0.2}\text{FeO}_{3-\delta}$  at 500 °C. The calculated lattice parameters were  $a = b = c = 3.898(8)$  Å. At 50 °C the structure was indexed with an orthorhombic space group, and at 500 °C the cubic  $Pm-3m$  space group explained all reflections. The inset in (a) magnifies the difference in the high-order reflections for the patterns collected at 50 °C and 500 °C.

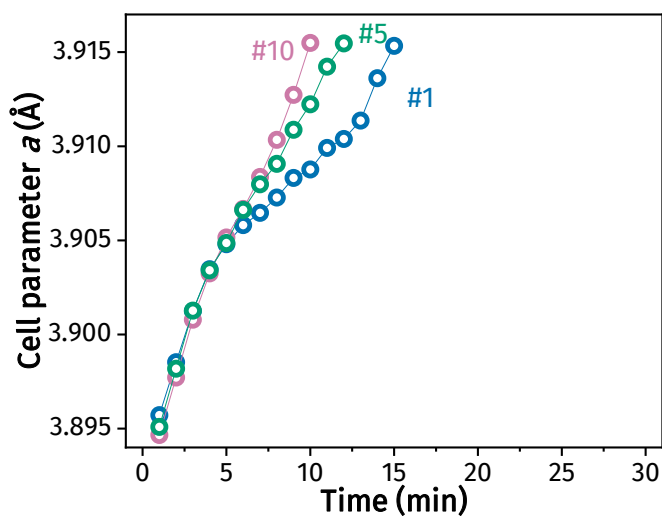

Figure S10 – Evolution of the cell parameter of the perovskite  $\text{Sr}_{0.8}\text{Ca}_{0.2}\text{FeO}_{3-\delta}$  with time under  $\text{N}_2$  at 500 °C.

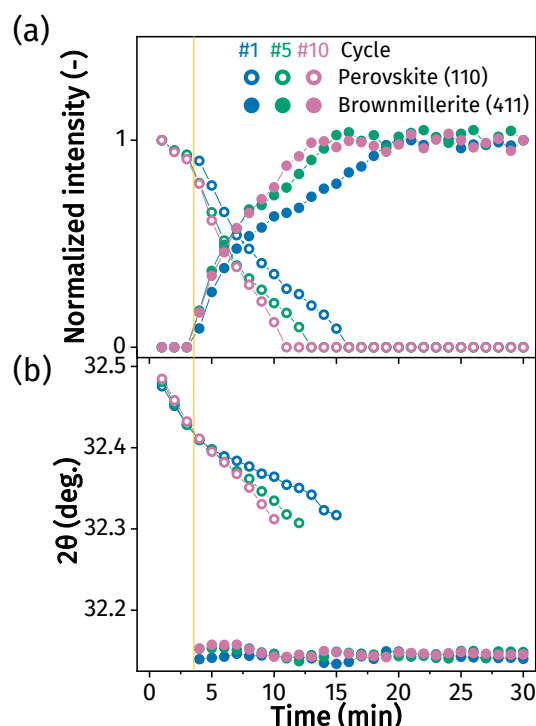

Figure S11 – Evolution of (a) the integrated intensity normalized with respect to the maximum observed intensity and (b) peak position of the perovskite (110) and brownmillerite (411) peaks, related to the measurements shown in Figure 4. The yellow vertical line indicates the onset of the phase transition from perovskite to brownmillerite at ~ 4 min.

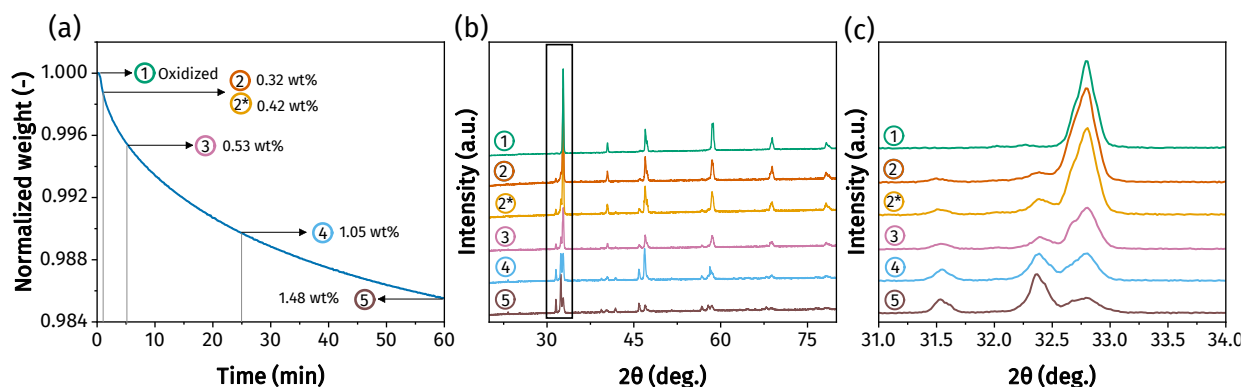

Figure S12 – Ex-situ studies of the structural evolution of  $\text{Sr}_{0.8}\text{Ca}_{0.2}\text{FeO}_{3-\delta}$  at different degrees of reduction. (a) Normalized weight upon reduction in  $\text{N}_2$  at  $500^\circ\text{C}$  in the TGA. Samples were collected at different times of reduction (1 @ 0 min, 2 and 2\* @ 1 min, 3 @ 5 min, 4 @ 25 min, 5 @ 60 min) with the corresponding (1 – 5) XRD patterns (collected at room temperature and ambient air) shown in (b), and magnified in (c) in the  $2\theta$  range  $31 - 34^\circ$ . The XRD pattern corresponding to point 2\* is that of an activated sample (i.e. treatment in synthetic air at  $600^\circ\text{C}$  for 2 h), collected after the same time as point 2. Note that the evolution of the perovskite peak observed in (c) (i.e. at room temperature) is different from the one observed with in-situ XRD measurements at  $500^\circ\text{C}$  (Figure 4). Here, we observe a splitting of the perovskite peak upon reduction, while at  $500^\circ\text{C}$  the perovskite peak only shifts gradually to lower angles, without any splitting. This is because at room temperature the perovskite has an orthorhombic structure, while under operating conditions ( $500^\circ\text{C}$ ), i.e. the temperature at which in-situ XRD patterns were collected, the perovskite has a cubic structure.

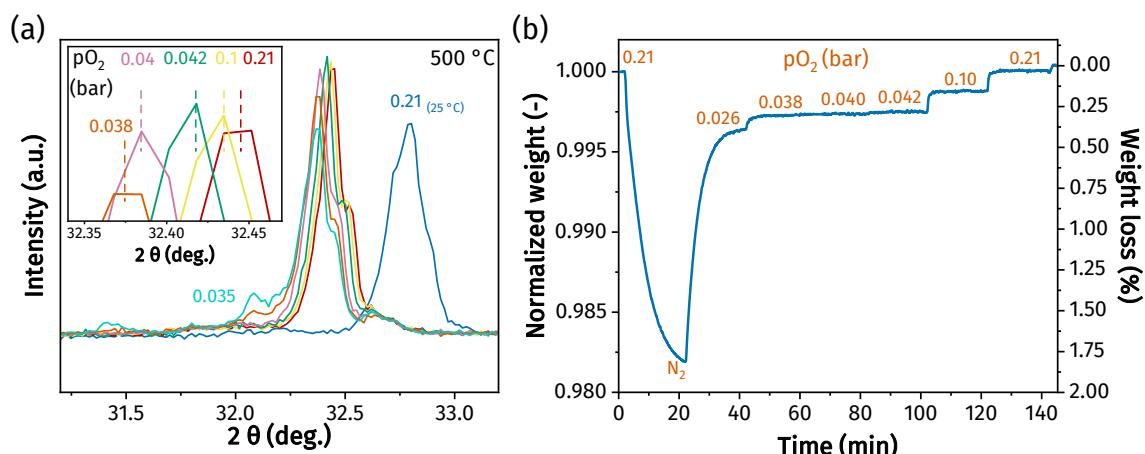

Figure S13 – Change in the peak position of the perovskite peak (110) before the onset of the phase transition from perovskite to brownmillerite and the corresponding amount of oxygen release. (a) In-situ XRD patterns of  $\text{Sr}_{0.8}\text{Ca}_{0.2}\text{FeO}_{3-\delta}$  at 500 °C at different  $p\text{O}_2$  obtained by using mixtures of air and  $\text{N}_2$  (total flow rate  $200 \text{ mL min}^{-1}$ ). The scans were collected 10 min after the change in the gas environment. (b) TGA measurement at 500 °C at different  $p\text{O}_2$  obtained by using mixtures of compressed air and  $\text{N}_2$  (total flow rate  $150 \text{ mL min}^{-1}$ ). Each  $p\text{O}_2$  step was 20 min.

### 3. Surface analysis

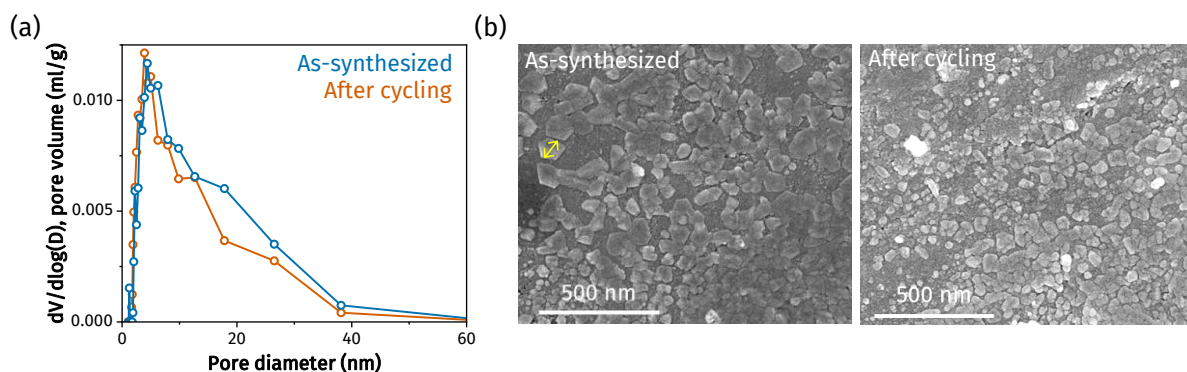

Figure S14 – Textural properties of  $\text{Sr}_{0.8}\text{Ca}_{0.2}\text{FeO}_{3-\delta}$ . (a) Pore volume distribution and (b) HR-SEM of the as-synthesized sample and after 10 redox cycles at 500 °C.

Table S2 – Position and intensity of the peaks in the Sr 3d, O 1s, Fe 2p and C 1s XPS spectra.

| Sample                 | Name | Position (eV) | Intensity |
|------------------------|------|---------------|-----------|
| Air-tight              | Sr3d | 133.1         | 10819     |
|                        | O1s  | 531.2         | 13784     |
|                        | Fe2p | 710.4         | 9305      |
|                        | C1s  | 289           | 165       |
| $\text{CO}_2$ -treated | Sr3d | 133.1         | 10824     |
|                        | O1s  | 531.3         | 13805     |
|                        | Fe2p | 710.4         | 9309      |
|                        | C1s  | 289.05        | 4651      |
| As-synthesized         | Sr3d | 133.1         | 10818     |
|                        | O1s  | 531.3         | 13808     |
|                        | Fe2p | 710.4         | 9310      |

|                    |      |        |       |
|--------------------|------|--------|-------|
|                    | C1s  | 289.05 | 4622  |
| <b>First cycle</b> | Sr3d | 133.1  | 10821 |
|                    | O1s  | 531.3  | 13804 |
|                    | Fe2p | 710.4  | 9308  |
|                    | C1s  | 289.05 | 4602  |
| <b>Third cycle</b> | Sr3d | 133.1  | 10821 |
|                    | O1s  | 531.3  | 13799 |
|                    | Fe2p | 710.4  | 9308  |
|                    | C1s  | 289.05 | 4594  |
| <b>Fifth cycle</b> | Sr3d | 133.1  | 10821 |
|                    | O1s  | 531.3  | 13787 |
|                    | Fe2p | 710.4  | 9306  |
|                    | C1s  | 289.05 | 4588  |
| <b>Tenth cycle</b> | Sr3d | 133.1  | 10819 |
|                    | O1s  | 531.3  | 13786 |
|                    | Fe2p | 710.4  | 9306  |
|                    | C1s  | 289.05 | 4497  |

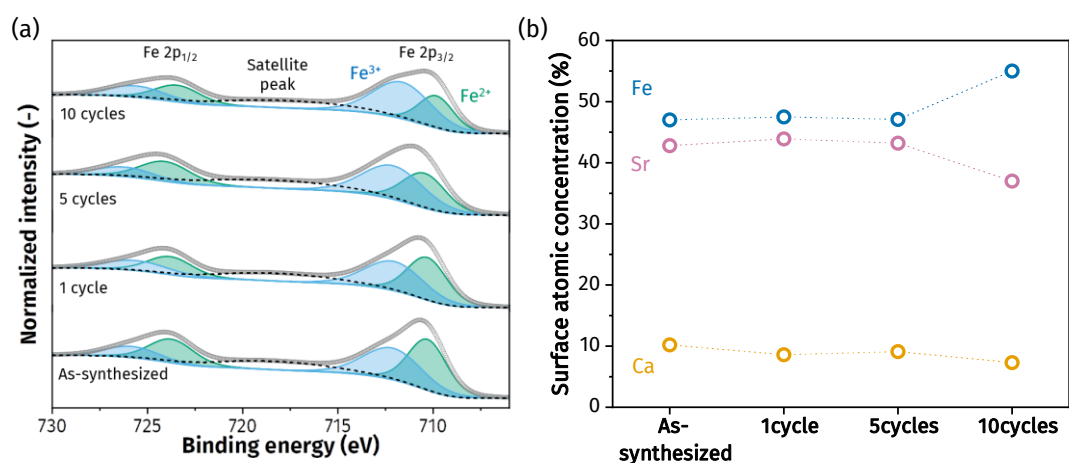

Figure S15 – (a) Fe XPS spectra of the as-synthesized  $\text{Sr}_{0.8}\text{Ca}_{0.2}\text{FeO}_{3-\delta}$  and after 1, 5 and 10 redox cycles in the TGA. (b) Atomic concentration at the surface of the sample as synthesized and after 1, 5 and 10 redox cycles measured with XPS.

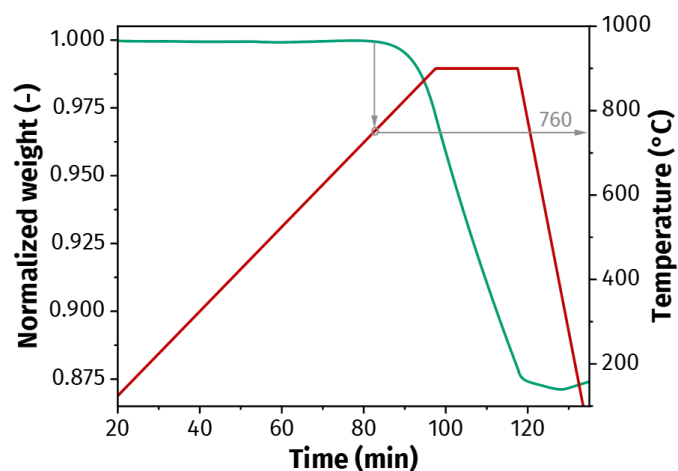

Figure S16 – Decomposition of  $\text{SrCO}_3$ . Temperature programmed reduction of  $\text{SrCO}_3$  heating to  $900\text{ }^\circ\text{C}$  at  $5\text{ }^\circ\text{C min}^{-1}$  in  $\text{N}_2$  ( $150\text{ mL min}^{-1}$ ) and held at  $900\text{ }^\circ\text{C}$  for 30 min. The onset temperature of the decomposition of  $\text{SrCO}_3$  is at  $760\text{ }^\circ\text{C}$ .

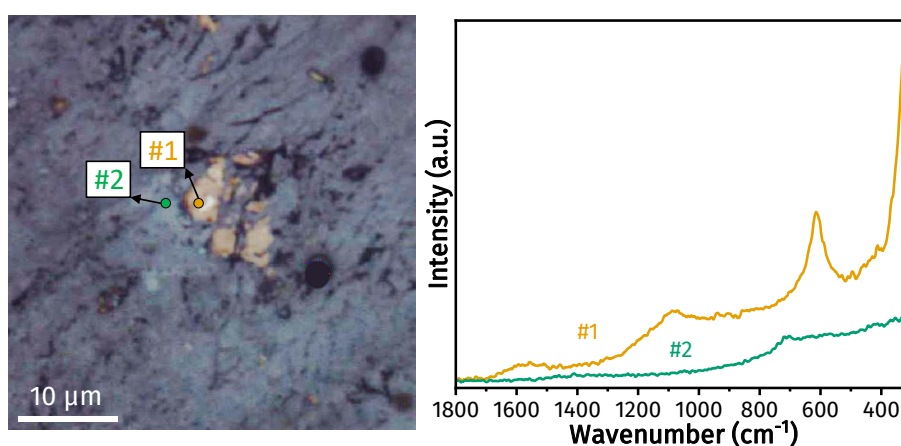

Figure S17 – Optical microscope image collected by using  $100\times$  optical magnification at  $25\text{ }^\circ\text{C}$  and corresponding Raman spectra, collected by using  $50\times$  optical magnification, of the as-synthesized  $\text{Sr}_{0.8}\text{Ca}_{0.2}\text{FeO}_{3-\delta}$ , ground to fine particles and pelletized.

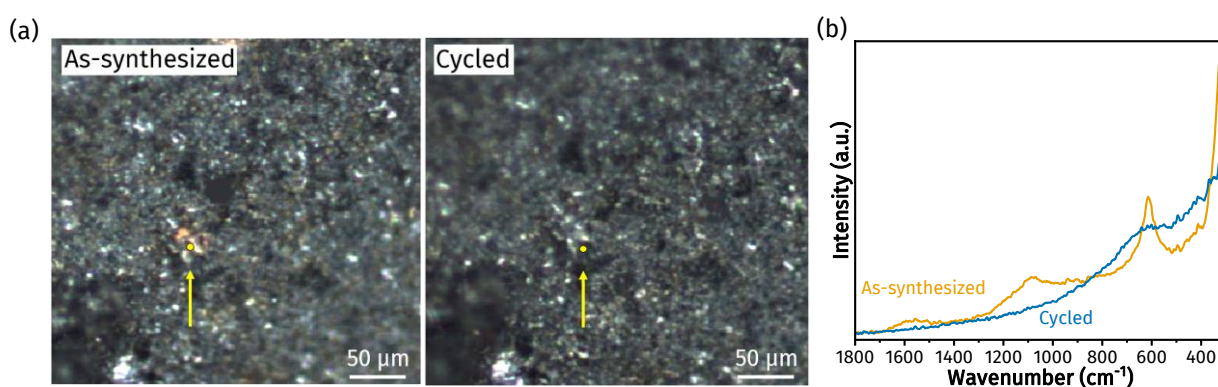

Figure S18 – (a) Optical microscope image of the as-synthesized and cycled sample collected at  $25\text{ }^\circ\text{C}$  by using  $10\times$  optical magnification; (b) corresponding Raman spectra. The as-synthesized sample was ground to fine particles and pelletized. The sample was heated in the in-situ Raman cell to  $700\text{ }^\circ\text{C}$  in air (heating rate  $10\text{ }^\circ\text{C min}^{-1}$ ), then redox cycled once in  $\text{N}_2$  (40 min) and air (20 min), and cooled down to  $25\text{ }^\circ\text{C}$ .

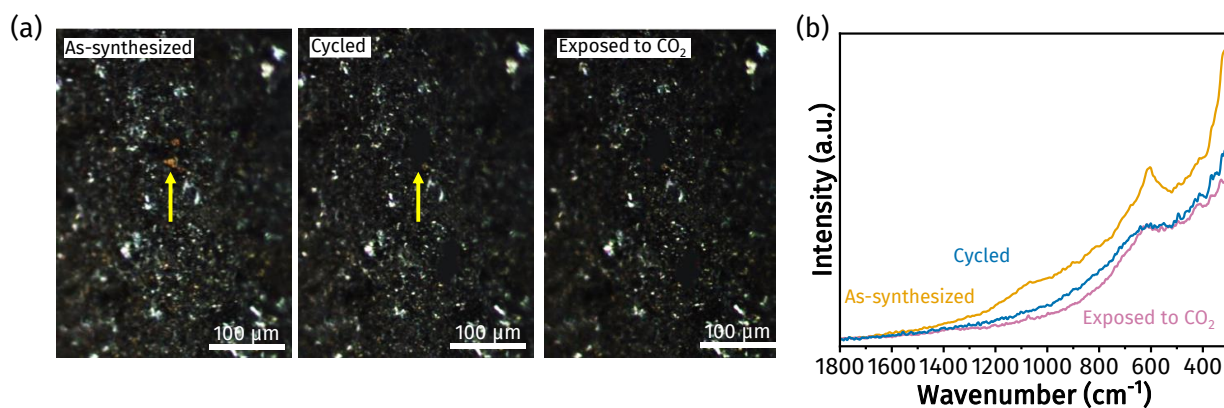

Figure S19 – (a) Optical microscope images collected by using 10 $\times$  optical magnification of: As-synthesized sample at 25  $^{\circ}$ C; the sample heated to 700  $^{\circ}$ C in air (heating rate 10  $^{\circ}$ C min $^{-1}$ ), and then redox cycled once in N $_2$  (40 min) and air (20 min); the sample after exposure at 500  $^{\circ}$ C to CO $_2$  for 20 min; (b) corresponding Raman spectra.



## References

- [1] Luongo, G., Donat, F., Müller, C. R., *Physical Chemistry Chemical Physics*, **2020**, 22(17), pp.9272-9282.
- [2] Tamai, K., Hosokawa, S., Kato, K., Asakura, H., Teramura, K., Tanaka, T., *Physical Chemistry Chemical Physics*, **2020**, 22(42), pp.24181-24190.
